# Supplementary material for: A Nanozymatic-Mediated Smartphone Colorimetric Sensing Platform for the Detection of Dimethyl Phthalate (DMP) and Dibutyl Phthalate (DBP)
Source: MDPI journal article supplement (doi:10.3390/bios13100919), 2023-10-08
Supplement: s1 [file s1]

# A Nanozymatic-Mediated Smartphone Colorimetric Sensing Platform for the Detection of Dimethyl Phthalate (DMP) and Dibutyl Phthalate (DBP)

Wenhui Li <sup>1</sup>, Xuecheng Zhang <sup>2</sup>, Haojie Zhang <sup>2</sup>, Cheng Zhang <sup>2</sup>, Yingjie Chen <sup>2</sup>, Cong Li <sup>3</sup>, Yonghong Hu <sup>1</sup>, Xiaoping Yu <sup>2</sup>, Biao Zhang <sup>2</sup> and Xiaodong Lin <sup>4,\*</sup>

<sup>1</sup> College of Food and Light Industry, Nanjing Tech University, Nanjing 211816, China; li3781692@njut.edu.cn (W.L.); hyh@njut.edu.cn (Y.H.)  
<sup>2</sup> Zhejiang Provincial Key Laboratory of Biometrology and Inspection & Quarantine, College of Life Sciences, China Jiliang University, Hangzhou 310018, China; zhangxuecheng@cjlu.edu.cn (X.Z.); zhj20@cjlu.edu.cn (H.Z.); zhangcheng@cjlu.edu.cn (C.Z.); cyj221@cjlu.edu.cn (Y.C.); yxp@cjlu.edu.cn (X.Y.); zb@cjlu.edu.cn (B.Z.)  
<sup>3</sup> Agriculture and Rural Bureau of Zhuozhou, Zhuozhou 072750, China; lic1995@126.com  
<sup>4</sup> Zhuhai UM Science & Technology Research Institute, Zhuhai 519000, China  
\* Correspondence: zumri.xdlin@um.edu.cn

Table S1

Figure S1

Figure S2

Figure S3

Figure S4

**Table S1.** Experimental results of catalytic performance of Pt@Au nanozyme.

|                                     | Tube 1 | Tube 2   | Tube 3   | Tube 4    |
|-------------------------------------|--------|----------|----------|-----------|
| TMB color development solution (μL) | 550.0  | 550.0    | 550.0    | 550.0     |
| Water (μL)                          | 10.0   | 0        | 0        | 0         |
| Diluted Pt@Au (μL)                  | 0      | 5.0      | 10.0     | 20.0      |
| B value                             | 0      | 22.5±7.4 | 40.7±5.8 | 100.5±6.3 |

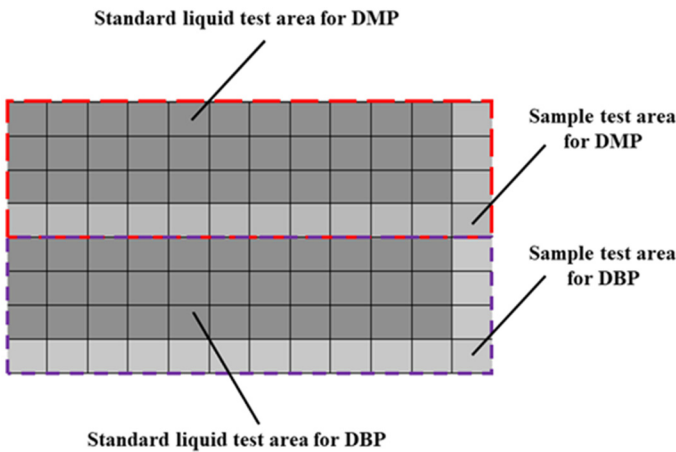

**Figure S1.** Standard liquid test areas and sample test areas of DMP and DBP in 96 Microporous plates.

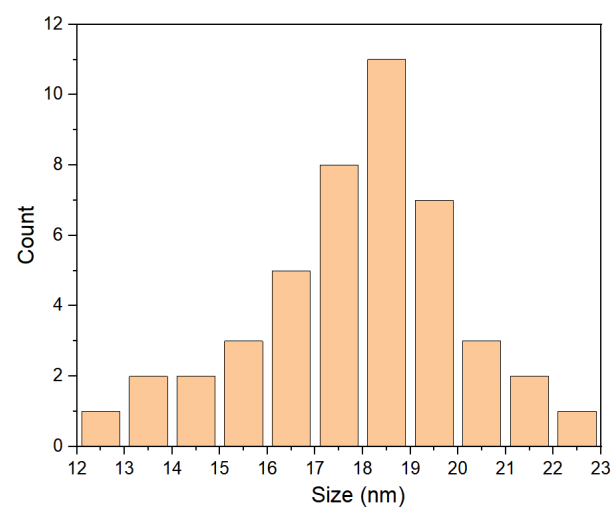

**Figure S2.** The size distribution of Pt@Au nanzyme.

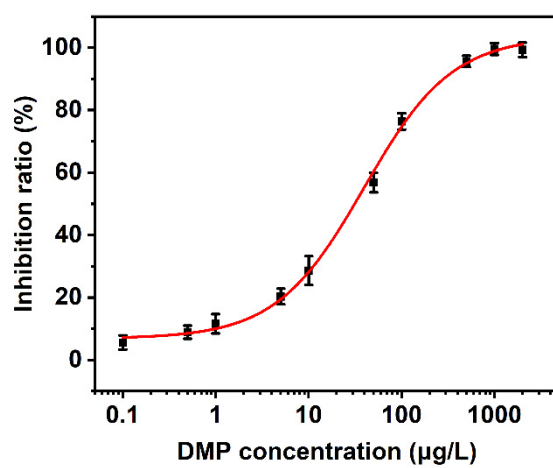

**Figure S3.** ELISA standard curve for DMP in PBS..

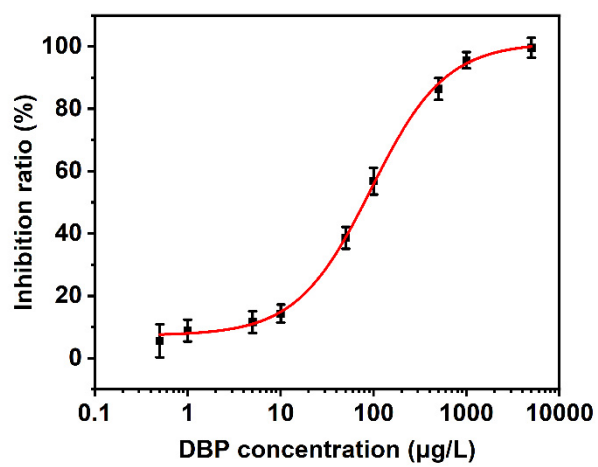

**Figure S4.** ELISA standard curve for DBP in PBS.
